# Supplementary material
Source: Research Square preprint supplement (doi:10.21203/rs.3.rs-9237978/v1)
Supplement: Supplementary file 1 [file 6f09c726f35e33c9dc76ecde.pdf]

## SUPPLEMENTARY FILE

### PRISMA Flow Diagram

|                                                            |
|------------------------------------------------------------|
| <b>Records identified through database searching (n=7)</b> |
| <b>Duplicates removed (n=1)</b>                            |
| <b>Records screened (n=6)</b>                              |
| <b>Records excluded (n=3)</b>                              |
| <b>Full-text articles assessed (n=3)</b>                   |
| <b>Studies included in review (n=3)</b>                    |

### PRISMA-ScR Checklist

| <b>Section</b>              | <b>Item</b>                | <b>Reported<br/>(Yes/No)</b> | <b>Location</b>    |
|-----------------------------|----------------------------|------------------------------|--------------------|
| <b>Title</b>                | Identify as scoping review | Yes                          | Title              |
| <b>Abstract</b>             | Structured summary         | Yes                          | Abstract           |
| <b>Introduction</b>         | Rationale                  | Yes                          | Introduction       |
| <b>Objectives</b>           | Research question          | Yes                          | Method             |
| <b>Protocol</b>             | Protocol described         | Yes                          | Method             |
| <b>Eligibility criteria</b> | Inclusion/exclusion        | Yes                          | Method             |
| <b>Information sources</b>  | Databases listed           | Yes                          | Method             |
| <b>Search</b>               | Full strategy              | Yes                          | Supplementary File |
| <b>Selection of sources</b> | Screening process          | Yes                          | Method             |
| <b>Data charting</b>        | Data extraction described  | Yes                          | Method             |
| <b>Synthesis</b>            | Thematic analysis          | Yes                          | Results            |
| <b>Limitations</b>          | Stated                     | Yes                          | Discussion         |
| <b>Funding</b>              | Not applicable             | Yes                          | End                |

## FULL SEARCH STRATEGIES

### PubMed

("neurofeminism"[Title/Abstract] OR "feminist neuroscience"[Title/Abstract] OR "gender bias"[Title/Abstract])

AND ("neuroscience"[MeSH Terms] OR "brain plasticity"[Title/Abstract])

AND ("ethics"[MeSH Terms] OR "bioethics"[Title/Abstract] OR "health law"[Title/Abstract])

AND ("gender identity"[MeSH Terms] OR "sex differences"[Title/Abstract])

Filters: English, 2000–2025

### Scopus

TITLE-ABS-KEY("neurofeminism" OR "feminist neuroscience" OR "gender bias")

AND TITLE-ABS-KEY("neuroscience" OR "brain plasticity")

AND TITLE-ABS-KEY("ethics" OR "bioethics" OR "health law")

AND TITLE-ABS-KEY("gender identity" OR "sex differences")

### Web of Science

TS=("neurofeminism" OR "feminist neuroscience" OR "gender bias")

AND TS=("neuroscience" OR "brain plasticity")

AND TS=("ethics" OR "bioethics" OR "health law")

AND TS=("gender identity" OR "sex differences")

### EBSCOhost

("neurofeminism" OR "feminist neuroscience" OR "gender bias")

AND ("neuroscience" OR "brain plasticity")

AND ("ethics" OR "bioethics" OR "health law")

AND ("gender identity" OR "sex differences")

### ScienceDirect

("neurofeminism" OR "feminist neuroscience" OR "gender bias")

AND ("neuroscience" OR "brain plasticity")

AND ("ethics" OR "bioethics" OR "health law")

AND ("gender identity" OR "sex differences")

## SCREENING LOG

| Study ID | Database      | Stage          | Decision | Reason         |
|----------|---------------|----------------|----------|----------------|
| S1       | PubMed        | Full-text      | Included | Meets criteria |
| S2       | Scopus        | Title/Abstract | Excluded | Letter         |
| S3       | EBSCO         | Title/Abstract | Excluded | Irrelevant     |
| S4       | ScienceDirect | Title/Abstract | Excluded | Irrelevant     |
| S5       | WoS           | Duplicate      | Excluded | Duplicate      |
| S6       | PubMed        | Full-text      | Included | Meets criteria |
| S7       | Scopus        | Full-text      | Included | Meets criteria |

## DATA EXTRACTION FORM

| Author           | Year | Aim                   | Method     | Gender Focus | Ethical Issues    | Legal Issues        | Contribution          |
|------------------|------|-----------------------|------------|--------------|-------------------|---------------------|-----------------------|
| Hoffman & Bluhm  | 2016 | Neurosexism critique  | Conceptual | Strong       | Bias, stereotypes | Discrimination risk | Defines neurofeminism |
| Henry & Plemmons | 2012 | Neuroethics analysis  | Conceptual | Moderate     | Power misuse      | Justice, rights     | Policy implications   |
| Chalfin et al.   | 2008 | Gender in neuroethics | Commentary | Strong       | Responsibility    | Equality            | Feminist integration  |

## SYNTHESIS TABLE

| Theme                                       | Neurosexism and Neurofeminism                                                                                                                                                                                 | Neuroscience, Neuropolitics and Neuroethics:                                                                                                                                                                                                              | Women's Neuroethics? Why Sex Matters for Neuroethics                                                                                                                                                                      |
|---------------------------------------------|---------------------------------------------------------------------------------------------------------------------------------------------------------------------------------------------------------------|-----------------------------------------------------------------------------------------------------------------------------------------------------------------------------------------------------------------------------------------------------------|---------------------------------------------------------------------------------------------------------------------------------------------------------------------------------------------------------------------------|
| <b>Representation of Gender in Research</b> | <p>-Brain research is generally conducted based on a rigid binary structure (female/male), ignoring mosaic structures and overlaps.</p> <p>-Individual diversity and brain mosaicism are largely ignored.</p> | <p>Gender, racial, and class biases are embedded in the institutional practices of brain research.</p> <p>-Research samples and policy discussions often treat gender in a simplified manner.</p>                                                         | <p>-Brain science research on gender differences has increased significantly, but these studies do not adequately reflect the complexity of gender.</p> <p>-Gender is often reduced to binary categories in research.</p> |
| <b>Methodological Issues and Biases</b>     | <p>-Methodological choices and publication bias exaggerate gender differences.</p> <p>-Data selection, analysis, and presentation reinforce gender categories.</p>                                            | <p>-Research and practices are influenced by existing power structures; this can reproduce existing inequalities.</p> <p>-Studies are often conducted on non-representative or non-homogeneous groups.</p>                                                | <p>-Historically, biological differences such as brain size have been used to justify discrimination.</p> <p>-Care must be taken in interpretations to avoid repeating these errors in new research.</p>                  |
| <b>Ethical Implications</b>                 | <p>- It may promote the notion of "natural roles".</p> <p>-The potential harm of studies perpetuating injustice may outweigh the benefits to be gained.</p>                                                   | <p>-Neurotechnologies may increase the risks of discrimination, privacy violations, and surveillance, particularly for disadvantaged groups.</p> <p>- Applications made without sufficiently strong scientific evidence may lead to harmful outcomes.</p> | <p>-Gender-based drugs may lead to new forms of discrimination through interventions such as "brain-based learning".</p> <p>-Communication with the public must be conducted in a careful and responsible manner.</p>     |
| <b>Legal Implications</b>                   | <p>-There is a risk that neuroscience findings</p>                                                                                                                                                            | <p>-The biased or intrusive use of neuroscience in</p>                                                                                                                                                                                                    | <p>-Neuroethics should include principles that</p>                                                                                                                                                                        |

|                                                                 |                                                                                                                                                                                                                                                                             |                                                                                                                                 |                                                                                                                                                                                                     |
|-----------------------------------------------------------------|-----------------------------------------------------------------------------------------------------------------------------------------------------------------------------------------------------------------------------------------------------------------------------|---------------------------------------------------------------------------------------------------------------------------------|-----------------------------------------------------------------------------------------------------------------------------------------------------------------------------------------------------|
|                                                                 | <p>may be used in legal and educational policies to limit the rights of women and non-binary individuals.</p> <p>-Research shaping equality and access standards may lead to problematic outcomes.</p>                                                                      | <p>legal applications may lead to misinterpretations of concepts such as intent and responsibility.</p>                         | <p>prevent misapplications that could lead to discrimination in education, recruitment and medicine.</p> <p>-Clear ethical frameworks are necessary to ensure the fair application of findings.</p> |
| <p><b>Neurofeminist Recommendations</b></p>                     | <p>-We must move beyond binary gender categories by recognising brain mosaicism and individual differences.</p> <p>-Methodological practices should be reviewed and reformed.</p> <p>-Scientific communication should be conducted in an inclusive and balanced manner.</p> | <p>-Public debates, stakeholder participation, and awareness of structural inequalities must precede policy implementation.</p> | <p>-Neuroethics should encompass gender studies and develop safety measures to prevent bias and inequalities.</p>                                                                                   |
| <p><b>Comparative Thematic Analysis of Selected Studies</b></p> |                                                                                                                                                                                                                                                                             |                                                                                                                                 |                                                                                                                                                                                                     |
