# Supplementary material
Source: Research Square preprint supplement (doi:10.21203/rs.3.rs-9237978/v1)
Supplement: Supplementary file 2 [file 8d61331d52a4faeb055e3050.docx]

**SUPPLEMENTARY FILE**

**PRISMA Flow Diagram**

| **Records identified through database searching (n=7)** |
| --- |
| **Duplicates removed (n=1)** |
| **Records screened (n=6)** |
| **Records excluded (n=3)** |
| **Full-text articles assessed (n=3)** |
| **Studies included in review (n=3)** |

**PRISMA-ScR Checklist**

| Section | Item | Reported (Yes/No) | Location |
| --- | --- | --- | --- |
| Title | Identify as scoping review | Yes | Title |
| Abstract | Structured summary | Yes | Abstract |
| Introduction | Rationale | Yes | Introduction |
| Objectives | Research question | Yes | Method |
| Protocol | Protocol described | Yes | Method |
| Eligibility criteria | Inclusion/exclusion | Yes | Method |
| Information sources | Databases listed | Yes | Method |
| Search | Full strategy | Yes | Supplementary File |
| Selection of sources | Screening process | Yes | Method |
| Data charting | Data extraction described | Yes | Method |
| Synthesis | Thematic analysis | Yes | Results |
| Limitations | Stated | Yes | Discussion |
| Funding | Not applicable | Yes | End |

**FULL SEARCH STRATEGIES**

**PubMed**

("neurofeminism"[Title/Abstract] OR "feminist neuroscience"[Title/Abstract] OR "gender bias"[Title/Abstract])

AND ("neuroscience"[MeSH Terms] OR "brain plasticity"[Title/Abstract])

AND ("ethics"[MeSH Terms] OR "bioethics"[Title/Abstract] OR "health law"[Title/Abstract])

AND ("gender identity"[MeSH Terms] OR "sex differences"[Title/Abstract])

Filters: English, 2000–2025

**Scopus**

TITLE-ABS-KEY("neurofeminism" OR "feminist neuroscience" OR "gender bias")

AND TITLE-ABS-KEY("neuroscience" OR "brain plasticity")

AND TITLE-ABS-KEY("ethics" OR "bioethics" OR "health law")

AND TITLE-ABS-KEY("gender identity" OR "sex differences")

**Web of Science**

TS=("neurofeminism" OR "feminist neuroscience" OR "gender bias")

AND TS=("neuroscience" OR "brain plasticity")

AND TS=("ethics" OR "bioethics" OR "health law")

AND TS=("gender identity" OR "sex differences")

**EBSCOhost**

("neurofeminism" OR "feminist neuroscience" OR "gender bias")

AND ("neuroscience" OR "brain plasticity")

AND ("ethics" OR "bioethics" OR "health law")

AND ("gender identity" OR "sex differences")

**ScienceDirect**

("neurofeminism" OR "feminist neuroscience" OR "gender bias")

AND ("neuroscience" OR "brain plasticity")

AND ("ethics" OR "bioethics" OR "health law")

AND ("gender identity" OR "sex differences")

**SCREENING LOG**

| Study ID | Database | Stage | Decision | Reason |
| --- | --- | --- | --- | --- |
| S1 | **PubMed** | **Full-text** | **Included** | **Meets criteria** |
| S2 | **Scopus** | **Title/Abstract** | **Excluded** | **Letter** |
| S3 | **EBSCO** | **Title/Abstract** | **Excluded** | **Irrelevant** |
| S4 | **ScienceDirect** | **Title/Abstract** | **Excluded** | **Irrelevant** |
| S5 | **WoS** | **Duplicate** | **Excluded** | **Duplicate** |
| S6 | **PubMed** | **Full-text** | **Included** | **Meets criteria** |
| S7 | **Scopus** | **Full-text** | **Included** | **Meets criteria** |

**DATA EXTRACTION FORM**

| Author | Year | Aim | Method | Gender Focus | Ethical Issues | Legal Issues | Contribution |
| --- | --- | --- | --- | --- | --- | --- | --- |
| Hoffman & Bluhm | **2016** | **Neurosexism critique** | **Conceptual** | **Strong** | **Bias, stereotypes** | **Discrimination risk** | **Defines neurofeminism** |
| Henry & Plemmons | **2012** | **Neuroethics analysis** | **Conceptual** | **Moderate** | **Power misuse** | **Justice, rights** | **Policy implications** |
| Chalfin et al. | **2008** | **Gender in neuroethics** | **Commentary** | **Strong** | **Responsibility** | **Equality** | **Feminist integration** |

**SYNTHESIS TABLE**

| **Theme** | **Neurosexism and Neurofeminism** | **Neuroscience, Neuropolitics and Neuroethics:** | **Women's Neuroethics? Why Sex Matters for Neuroethics** |
| --- | --- | --- | --- |
| **Representation of Gender in Research** | -Brain research is generally conducted based on a rigid binary structure (female/male), ignoring mosaic structures and overlaps.  -Individual diversity and brain mosaicism are largely ignored. | Gender, racial, and class biases are embedded in the institutional practices of brain research.  -Research samples and policy discussions often treat gender in a simplified manner. | -Brain science research on gender differences has increased significantly, but these studies do not adequately reflect the complexity of gender.  -Gender is often reduced to binary categories in research. |
| **Methodological Issues and Biases** | -Methodological choices and publication bias exaggerate gender differences.  -Data selection, analysis, and presentation reinforce gender categories. | -Research and practices are influenced by existing power structures; this can reproduce existing inequalities.  -Studies are often conducted on non-representative or non-homogeneous groups. | -Historically, biological differences such as brain size have been used to justify discrimination.  -Care must be taken in interpretations to avoid repeating these errors in new research. |
| **Ethical Implications** | - It may promote the notion of "natural roles".  -The potential harm of studies perpetuating injustice may outweigh the benefits to be gained. | -Neurotechnologies may increase the risks of discrimination, privacy violations, and surveillance, particularly for disadvantaged groups.  - Applications made without sufficiently strong scientific evidence may lead to harmful outcomes. | -Gender-based drugs may lead to new forms of discrimination through interventions such as "brain-based learning".  -Communication with the public must be conducted in a careful and responsible manner. |
| **Legal Implications** | -There is a risk that neuroscience findings may be used in legal and educational policies to limit the rights of women and non-binary individuals.  -Research shaping equality and access standards may lead to problematic outcomes. | -The biased or intrusive use of neuroscience in legal applications may lead to misinterpretations of concepts such as intent and responsibility. | -Neuroethics should include principles that prevent misapplications that could lead to discrimination in education, recruitment and medicine.  -Clear ethical frameworks are necessary to ensure the fair application of findings. |
| **Neurofeminist Recommendations** | -We must move beyond binary gender categories by recognising brain mosaicism and individual differences.  -Methodological practices should be reviewed and reformed.  -Scientific communication should be conducted in an inclusive and balanced manner. | -Public debates, stakeholder participation, and awareness of structural inequalities must precede policy implementation. | -Neuroethics should encompass gender studies and develop safety measures to prevent bias and inequalities. |
| **Comparative Thematic Analysis of Selected Studies** | | | |
